# Supplementary material for: High-performance capacitors based on NaNbO3 nanowires/poly(vinylidene fluoride) nanocomposites
Source: Royal Society of Chemistry journal article supplement (doi:10.1039/c8ta03084g), 2018-01-01
Supplement: c8ta03084g1.pdf [file c8ta03084g1.pdf]

## **High-performance capacitors based on the NaNbO<sub>3</sub> nanowires**

### **/poly(vinylidene fluoride) nanocomposites**

Zhongbin Pan<sup>a,b</sup>, Lingmin Yao<sup>c</sup>, Guanglong Ge<sup>a</sup>, Bo Shen<sup>\*a</sup>, Jiwei Zhai<sup>\*a</sup>

<sup>a</sup>Key Laboratory of Advanced Civil Engineering Materials, Ministry of Education, School of Materials Science & Engineering, Tongji University, 4800 Caoan Road, Shanghai 201804, China.

<sup>b</sup>School of Materials Science and Chemical Engineering, Ningbo University, Ningbo, Zhejiang, 315211, China.

<sup>c</sup>School of Physics and Electronic Engineering, Guangzhou University, Guangzhou, 510006, China.

\*E-mail: shenbo@tongji.edu.cn (Bo Shen), apzhai@tongji.edu.cn (Jiwei Zhai)

## Supporting information 1

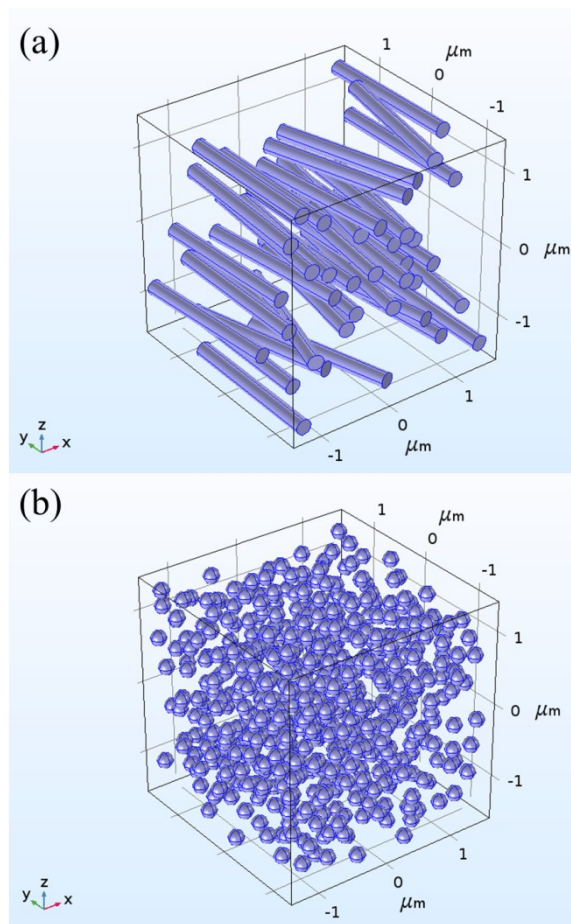

Figure S1 Three-dimensional models of the simulation system for (a) 9 vol% NN nanowires/PVDF and (b) 9 vol% NN nanoparticles/PVDF composite films.

## Supporting information 2

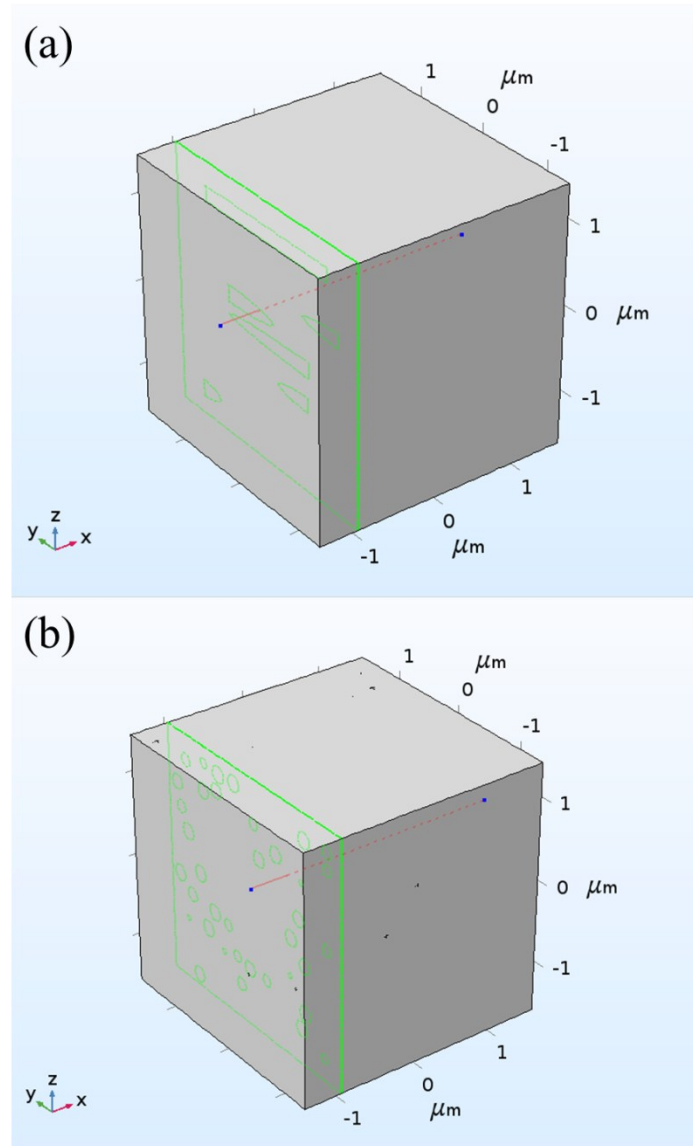

Figure S2 Cross-section images models of electric potential, local electric field, and leakage current density simulated for the (a) 9 vol% NN nanowires/PVDF nanocomposites and (b) 9 vol% NN nanoparticles/PVDF nanocomposites.

### Supporting information 3

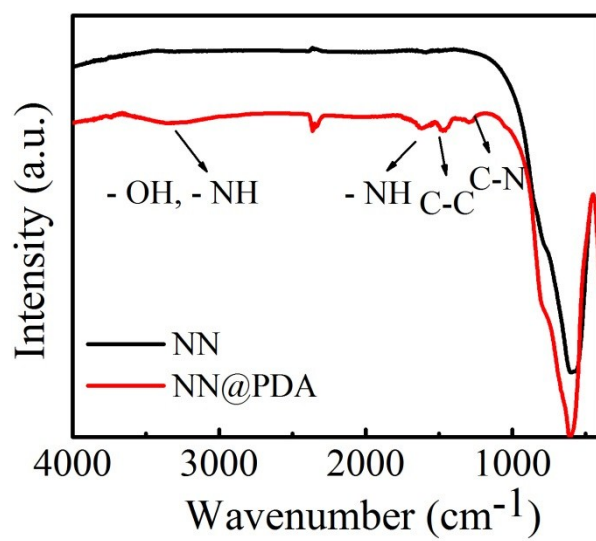

Figure S3 FT-IR spectrum of NN-PDA nanowires and NN nanowires.

#### Supporting information 4

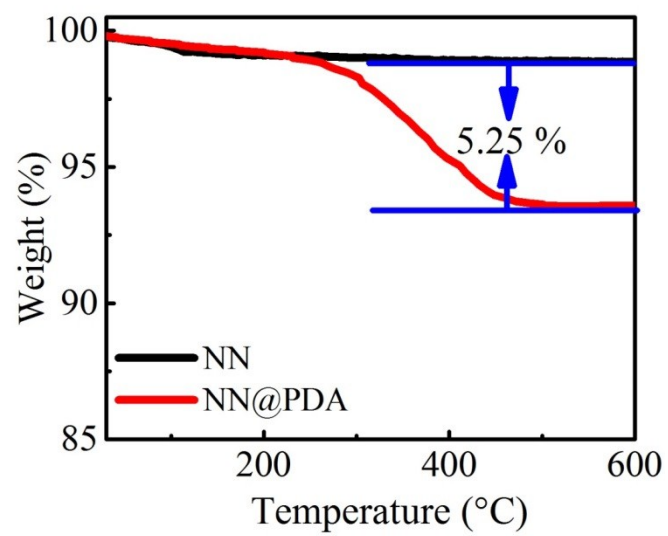

Figure S4 TGA curves of NN-PDA nanowires and NN nanowires.

## Supporting information 5

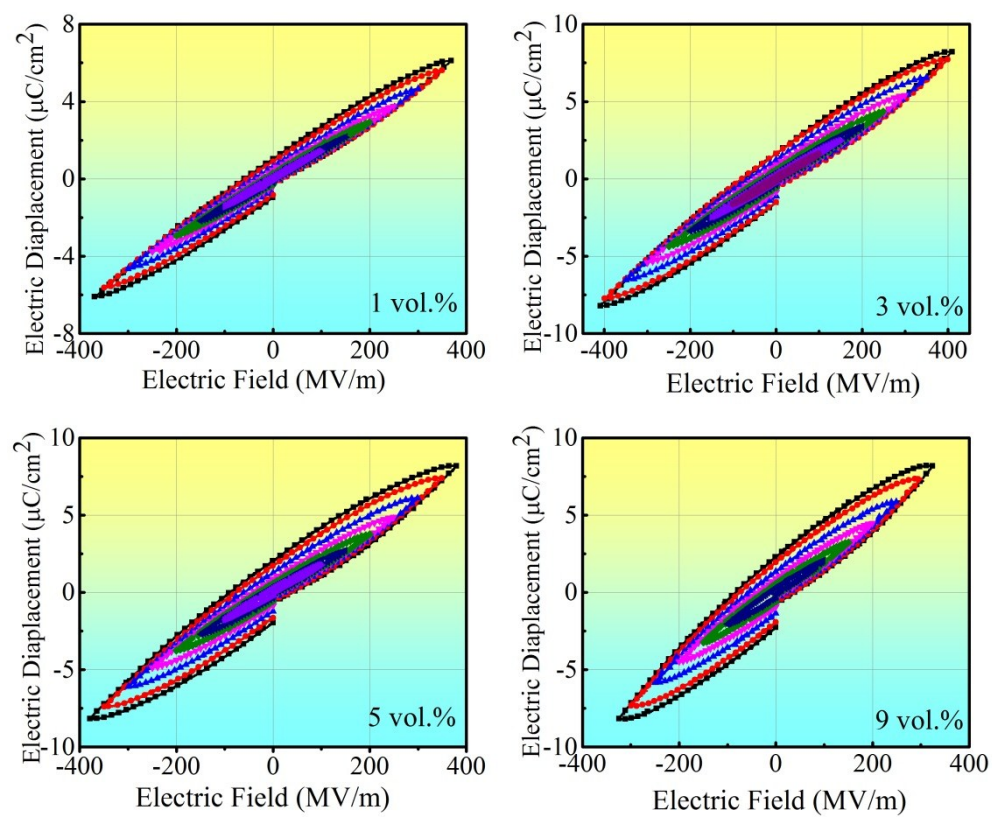

Figure S5 D-E curves of NN@PDA nanowires/PVDF nanocomposites with different filler concentrations.
